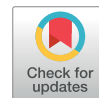

# Erratum

**Erratum. Response to Comment on Pathak et al. Severe Hypoglycemia Requiring Medical Intervention in a Large Cohort of Adults With Diabetes Receiving Care in U.S. Integrated Health Care Delivery Systems: 2005–2011. Diabetes Care 2016;39:363–370. Diabetes Care 2017;40:e26**

<https://doi.org/10.2337/dc17-er10>

*Ram D. Pathak, Emily B. Schroeder, Elizabeth R. Seaquist, Chan Zeng, Jennifer Elston Lafata, Abraham Thomas, Jean M. Lawrence, Andrew J. Karter, John F. Steiner, and Jodi Segal, Patrick J. O'Connor, for the SUPREME-DM Study Group*

In the article cited above, the duality of interest for author Emily B. Schroeder reads “E.B.S. received industry-sponsored research support from Novartis, Merck Sharpe & Dohme, Boehringer Ingelheim, AstraZeneca, and Bristol-Myers Squibb.” The author has requested that this be corrected to read “E.B.S. was supported by National Institute of Diabetes and Digestive and Kidney Diseases grant K23DK099237.”

The online version has been corrected to reflect this change.
